# Supplementary material
Source: PubMed Central journal article supplement (PMC5733714)
Supplement: NIHMS886017-supplement-supplement_1.pdf [file NIHMS886017-supplement-supplement_1.pdf]

**Supporting Information Accompanying Manuscript**  
**Cost-Effectiveness of Pre versus Post Liver Transplant Hepatitis C Treatment with Direct-Acting Antivirals**

Sumeyye Samur, PhD,<sup>1,2</sup> Brian Kues, PhD,<sup>3</sup> Turgay Ayer, PhD,<sup>3</sup> Mark S. Roberts, MD, MPP,<sup>4,5</sup> Fasiha Kanwal, MD, MSHS,<sup>6,7</sup> Chin Hur, MD, MPH<sup>1,2,8</sup> Drew Michael S. Donnell, MS,<sup>4,5</sup> Raymond T. Chung, MD,<sup>\*2,8</sup> Jagpreet Chhatwal, PhD,<sup>\*1,2,8</sup>

<sup>1</sup>Massachusetts General Hospital Institute for Technology Assessment, Boston, MA

<sup>2</sup>Harvard Medical School, Boston, MA

<sup>3</sup>Department of Industrial and Systems Engineering, Georgia Institute of Technology, Atlanta, GA

<sup>4</sup>Department of Health Policy and Management, University of Pittsburgh Graduate School of Public Health, Pittsburgh, PA

<sup>5</sup>University of Pittsburgh School of Medicine, Pittsburgh, PA

<sup>6</sup>Department of Medicine, Gastroenterology and Hepatology, Baylor College of Medicine, Houston, TX

<sup>7</sup>Houston Veterans Affairs Health Services Research and Development Center of Excellence, Michael E. DeBakey Veterans Affairs Medical Center, Houston, TX

<sup>8</sup>Liver Center and Gastrointestinal Division, Massachusetts General Hospital, Boston, MA

**\*Co-senior authors**

**Corresponding author:**

**Jagpreet Chhatwal, PhD**

MGH Institute for Technology Assessment

101 Merrimac Street, Floor 10<sup>th</sup>

Boston, MA 02114

Email: [JagChhatwal@mgh.harvard.edu](mailto:JagChhatwal@mgh.harvard.edu)

Tel: 1-617-724-4445; Fax: 1-617-726-9414

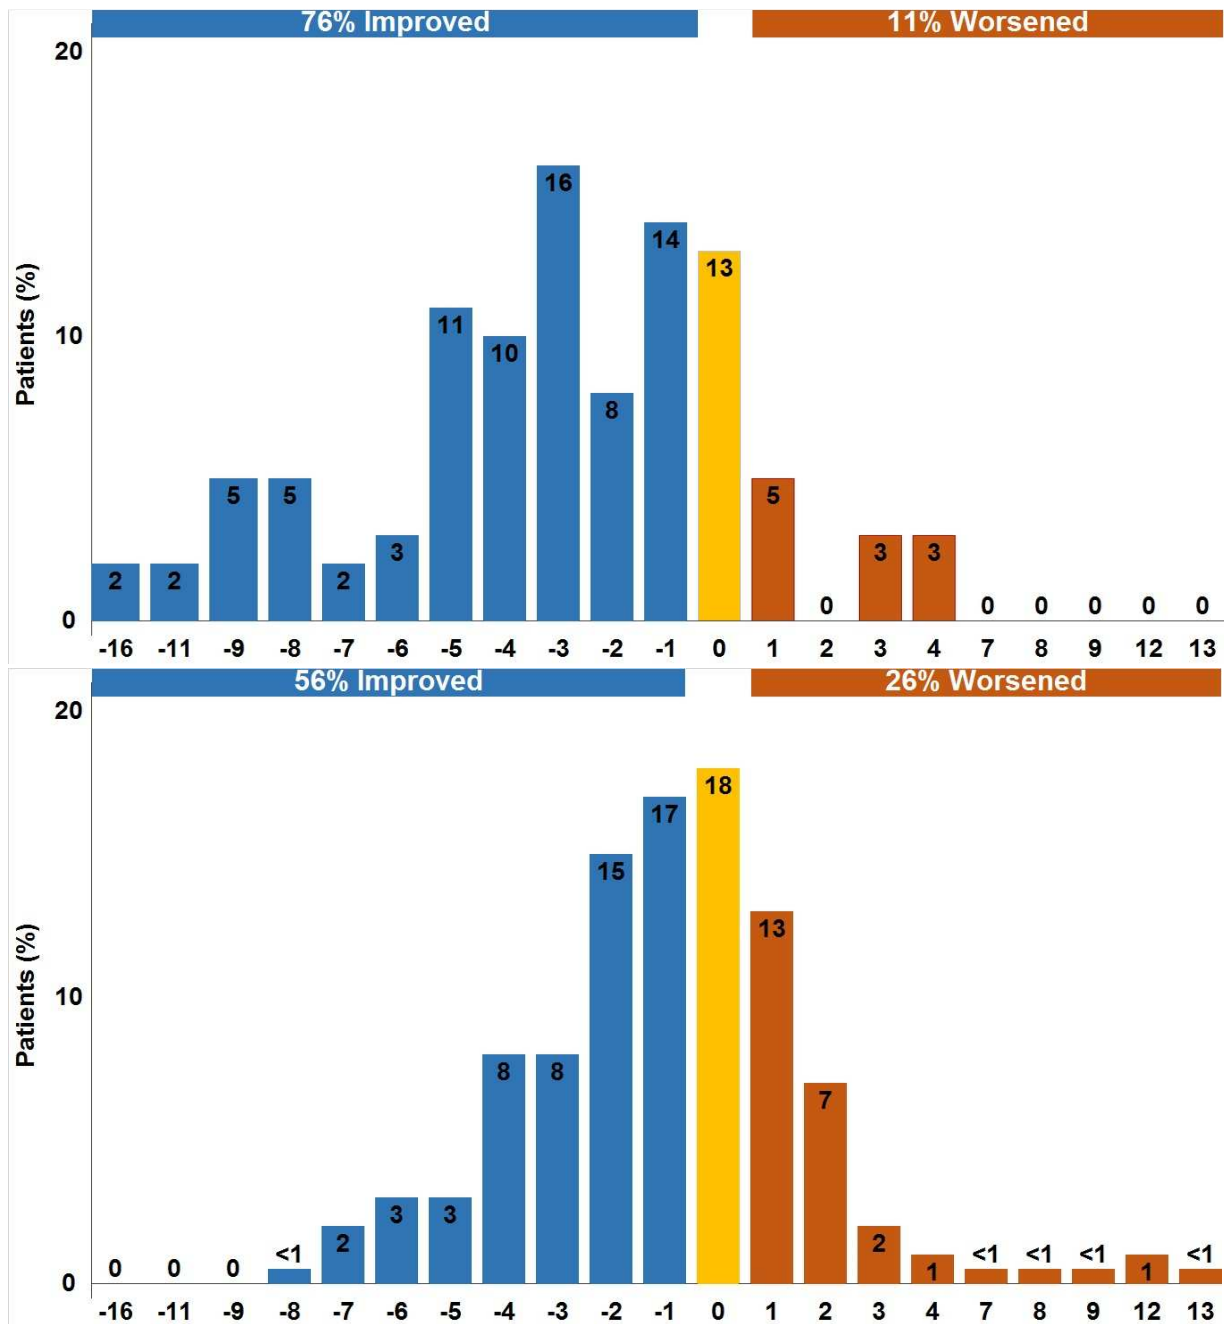

**Figure S1. Change in MELD scores because of HCV treatment in decompensated cirrhosis patients on the live transplant waiting list.** The top panel shows percentage change in patients having MELD score  $\geq 15$  and the bottom panel in patients having MELD  $< 15$ . Source: SOLAR 1 and 2 trials (1-3).

**Table S1. Weekly mortality on the liver transplant waiting list**

| <b>MELD Score</b> | <b>Weekly Mortality</b> |
|-------------------|-------------------------|
| 6-7               | 0.000014                |
| 8-9               | 0.000697                |
| 10-11             | 0.000691                |
| 12-13             | 0.000022                |
| 14-15             | 0.000681                |
| 16-17             | 0.000235                |
| 18-19             | 0.003659                |
| 20-21             | 0.007021                |
| 22-23             | 0.009891                |
| 24-25             | 0.011323                |
| 26-27             | 0.047260                |
| 28-29             | 0.078599                |
| 30-31             | 0.159678                |
| 32-33             | 0.192294                |
| 34-35             | 0.211013                |
| 36-37             | 0.273120                |
| 38-39             | 0.344884                |
| 40                | 0.481372                |

Source: Alagoz et al. (4) and UNOS data

**Table S2. Weekly Liver Transplantation Probabilities based on MELD score**

| <b>MELD Score</b> | <b>Weekly Probability of Liver Transplant</b> |
|-------------------|-----------------------------------------------|
| <14               | 0                                             |
| 14–15             | 0.008161                                      |
| 16–17             | 0.012561                                      |
| 18–19             | 0.026286                                      |
| 20–21             | 0.036498                                      |
| 22–23             | 0.052484                                      |
| 24–25             | 0.066997                                      |
| 26–27             | 0.078408                                      |
| 28–29             | 0.082616                                      |
| 30–31             | 0.084809                                      |
| 32–33             | 0.087066                                      |
| 34–35             | 0.084809                                      |
| 36–37             | 0.068787                                      |
| 38–39             | 0.066997                                      |
| 40                | 0.052484                                      |

Source: Massie et al. (5)

**Table S3.** Liver Transplant Model Variables: Baseline Values, Ranges, and

Parameters for Distributions Used in Deterministic and Probabilistic Sensitivity Analyses

| Parameter                                                                      | Base Case | Range       | Distribution | Parameter 1 <sup>a</sup> | Parameter 1 <sup>b</sup> |
|--------------------------------------------------------------------------------|-----------|-------------|--------------|--------------------------|--------------------------|
| <b>Sustained virologic response rate</b>                                       |           |             |              |                          |                          |
| Pre-LT SVR rate (1-3)                                                          | 0.840     | 0.700-0.930 | Beta         | 21.29                    | 4.05                     |
| Post-LT SVR rate (1-3)                                                         | 0.950     | 0.900-0.980 | Beta         | 68.39                    | 3.60                     |
| <b>Transition probabilities</b>                                                |           |             |              |                          |                          |
| Liver transplant to liver-related death (3 months of 1 <sup>st</sup> LT) *     | 0.124     | 0.118-0.129 | Beta         | 2069.63                  | 14620.96                 |
| Liver transplant to liver-related death (3 months of repeated LT) *            | 0.264     | 0.240-0.287 | Beta         | 372.25                   | 1037.79                  |
| Liver transplant to graft failure (3 months of 1 <sup>st</sup> LT) *           | 0.167     | 0.161-0.173 | Beta         | 2478.90                  | 12364.79                 |
| Liver transplant to graft failure (3 months of repeated LT) *                  | 0.312     | 0.287-0.336 | Beta         | 446.36                   | 984.28                   |
| Sustained virologic response to liver-related death (1 <sup>st</sup> year) (6) | 0.110     | 0.082-0.137 | Beta         | 54.59                    | 441.72                   |
| Sustained virologic response to liver-related death (subsequent year) (6)      | 0.032     | 0.024-0.04  | Beta         | 59.47                    | 1798.87                  |
| Sustained virologic response to graft failure (7)                              | 0.050     | 0.037-0.062 | Beta         | 58.34                    | 1108.50                  |
| F0-F2 to liver-related death (1 <sup>st</sup> year of 1 <sup>st</sup> LT) *    | 0.124     | 0.118-0.129 | Beta         | 2069.63                  | 14620.96                 |
| F0-F2 to liver-related death (Subsequent year of 1 <sup>st</sup> LT) *         | 0.041     | 0.040-0.042 | Beta         | 6163.39                  | 144530.78                |
| F0-F2 to liver-related death (1 <sup>st</sup> year of repeated LT) *           | 0.264     | 0.240-0.287 | Beta         | 372.25                   | 1037.79                  |
| F0-F2 to liver-related death (Subsequent year of repeated LT) *                | 0.072     | 0.070-0.075 | Beta         | 2053.37                  | 26465.67                 |
| F3-F4 to liver-related death (1 <sup>st</sup> year of 1 <sup>st</sup> LT) *    | 0.124     | 0.118-0.129 | Beta         | 2069.63                  | 14620.96                 |
| F3-F4 to liver-related death (Subsequent year of 1 <sup>st</sup> LT) *         | 0.041     | 0.040-0.042 | Beta         | 6163.39                  | 144530.78                |
| F3-F4 to liver-related death (1 <sup>st</sup> year of repeated LT) *           | 0.264     | 0.240-0.287 | Beta         | 372.25                   | 1037.79                  |
| F3-F4 to liver-related death (Subsequent year of repeated LT) *                | 0.072     | 0.070-0.075 | Beta         | 2053.37                  | 26465.67                 |
| F0-F2 to graft failure (1 <sup>st</sup> year of 1 <sup>st</sup> LT) *          | 0.167     | 0.161-0.173 | Beta         | 2478.90                  | 12364.79                 |
| F0-F2 to graft failure (1 <sup>st</sup> year of repeat LT) *                   | 0.312     | 0.287-0.336 | Beta         | 446.36                   | 984.28                   |
| F3-F4 to graft failure (1 <sup>st</sup> year of 1 <sup>st</sup> LT) (8)        | 0.290     | 0.315-0.525 | Beta         | 3.86                     | 9.46                     |
| F3-F4 to graft failure (1 <sup>st</sup> year of repeat LT) *                   | 0.312     | 0.287-0.336 | Beta         | 446.36                   | 984.28                   |
| F0-F2 to graft failure (subsequent year of 1 <sup>st</sup> LT) *               | 0.051     | 0.050-0.052 | Beta         | 9482.36                  | 176446.24                |
| F0-F2 to graft failure (subsequent year of repeat LT) *                        | 0.095     | 0.093-0.098 | Beta         | 3486.21                  | 33210.74                 |

|                                                                  |         |                 |       |         |           |
|------------------------------------------------------------------|---------|-----------------|-------|---------|-----------|
| F3–F4 to graft failure (subsequent year of 1 <sup>st</sup> LT) * | 0.051   | 0.050-0.052     | Beta  | 9482.36 | 176446.24 |
| F3–F4 to graft failure (subsequent year of repeat LT)*           | 0.095   | 0.093-0.098     | Beta  | 3486.21 | 33210.74  |
| Graft failure to liver-related death (9)                         | 0.652   | 0.489-0.815     | Beta  | 20.74   | 11.06     |
| Graft failure to repeat transplant(9)                            | 0.805   | 0.604-1         | Beta  | 11.96   | 2.90      |
| F0–F2 to F3–F4 (10)                                              | 0.044   | 0.040-0.055     | Beta  | 58.72   | 1275.76   |
| Decrease in transplant rate due to achieving SVR (11)            | 0.08    | 0.050-0.150     | Beta  | 4.54    | 52.17     |
| <b>Health-related quality-of-life weights</b>                    |         |                 |       |         |           |
| Transplant waiting list (12, 13)                                 | 0.800   | 0.570-0.990     | Beta  | 12.82   | 3.21      |
| Liver transplant (14)                                            | 0.600   | 0.370-0.730     | Beta  | 32.13   | 21.42     |
| F0–F2 (13, 14)                                                   | 0.828   | 0.716-0.865     | Beta  | 326.86  | 68.04     |
| F3–F4 (13, 14)                                                   | 0.801   | 0.693-0.837     | Beta  | 377.66  | 93.83     |
| Antiviral Treatment (14)                                         | 0.890   | 0.770-0.930     | Beta  | 208.31  | 25.75     |
| Sustained virologic response (14)                                | 0.890   | 0.770-0.930     | Beta  | 208.31  | 25.75     |
| Graft failure (12)                                               | 0.800   | 0.570-0.990     | Beta  | 12.82   | 3.21      |
| <b>Costs</b>                                                     |         |                 |       |         |           |
| 12-week HCV treatment (15)                                       | 95,523  | 0.570-0.990     | Gamma | 61.46   | 1,554.08  |
| Monitoring cost if treated in WL (weekly) (16)                   | 74      | 0.370-0.730     | Gamma | 61.46   | 1.20      |
| WL (annual) (16)                                                 | 20,841  | 15,630-26,050   | Gamma | 61.46   | 339.07    |
| LT-1 <sup>st</sup> year (annual) (17)                            | 180,358 | 103,102-739,100 | Gamma | 0.40    | 450,582.1 |
| Post-LT (annual) (17)                                            | 44,388  | 33,291-55,485   | Gamma | 61.46   | 722.16    |

\* Based on OPTN data as of March 4, 2016

<sup>a</sup> Parameter 1 corresponds to  $\alpha$  parameter for beta distribution,  $k$  (*shape*) parameter for gamma distribution

<sup>b</sup> Parameter 2 corresponds to  $\beta$  parameter for beta distribution,  $\theta$  (*scale*) parameter for gamma distribution

**Table S4. Health-Related Quality-of-Life Utilities of the United States Population**

| <b>Age Group</b> | <b>Male</b> | <b>Female</b> |
|------------------|-------------|---------------|
| 20–29            | 0.928       | 0.913         |
| 30–39            | 0.918       | 0.893         |
| 40–49            | 0.887       | 0.863         |
| 50–59            | 0.861       | 0.837         |
| 60–69            | 0.84        | 0.811         |
| 70–79            | 0.802       | 0.771         |
| 80–89            | 0.782       | 0.724         |

Source: Hanmer et al.(18)

## Section S1. Transplant Rate and Mortality by UNOS Region

We used UNOS-reported transplantation and death rates for each region to adjust the probability of receiving a LT and probability of death on the waiting list. Particularly, we estimated the ratio of observed transplant rate of each region and overall rate in the United States. Using the ratio, we estimated region-specific rates as follow:

$$\text{Region-specific-probability} = (1 - \text{National probability})^{\text{Ratio}}$$

**Table S5. Transplantation and Death Ratios by UNOS Regions**

| Region      | Transplantation<br>(Rate per 100<br>Person Years) | Ratio (Region /<br>U.S.) | Death (Rate<br>per 100 Person<br>Years) | Ratio (Region /<br>U.S.) |
|-------------|---------------------------------------------------|--------------------------|-----------------------------------------|--------------------------|
| 1           | 30.5                                              | 0.709                    | 19                                      | 1.061                    |
| 2           | 34                                                | 0.791                    | 18.4                                    | 1.028                    |
| 3           | 110.2                                             | 2.563                    | 20.1                                    | 1.123                    |
| 4           | 29.8                                              | 0.693                    | 15.9                                    | 0.888                    |
| 5           | 28.7                                              | 0.667                    | 16.9                                    | 0.944                    |
| 6           | 50.5                                              | 1.174                    | 21.3                                    | 1.190                    |
| 7           | 47.8                                              | 1.112                    | 19.2                                    | 1.073                    |
| 8           | 37.9                                              | 0.881                    | 16                                      | 0.894                    |
| 9           | 26.4                                              | 0.614                    | 17.2                                    | 0.961                    |
| 10          | 68.8                                              | 1.600                    | 20                                      | 1.117                    |
| 11          | 76.9                                              | 1.788                    | 18.9                                    | 1.056                    |
| <b>U.S.</b> | <b>43.0</b>                                       |                          | <b>17.9</b>                             |                          |



## **Section S2. Cost-Effectiveness Results by UNOS Regions**

We conducted a subgroup analysis to evaluate the cost-effectiveness results for each of the 11 UNOS region. In particular, we plotted the clinical and cost effectiveness of the timing of HCV treatment by patient's MELD score in each region (**Figure S2–S12**). The dotted lines on each plot show the clinical threshold below which pre-LT treatment is more effective than post-LT treatment. Different shaded regions represent the cost-effectiveness of the timing of HCV treatment. Note that a strategy is cost-saving when it results in more QALYs for lower costs than the comparator, and it is cost-effective when it provides more QALYs for higher costs *and* the ICER is below the commonly accepted willingness to pay threshold, i.e. \$100,000-per-QALY.

We found that below MELD score 19 pre-LT treatment was cost-effective, and above MELD score 27 post-LT treatment was cost-effective irrespective of the UNOS region. For MELD scores between 19 and 27, the price of DAAs in the UNOS region determined the cost-effectiveness of pre-LT HCV treatment. We found that price threshold for DAAs below which pre-LT treatment was cost-effective varied between \$8,600 and \$74,000 depending on the MELD score and the region.

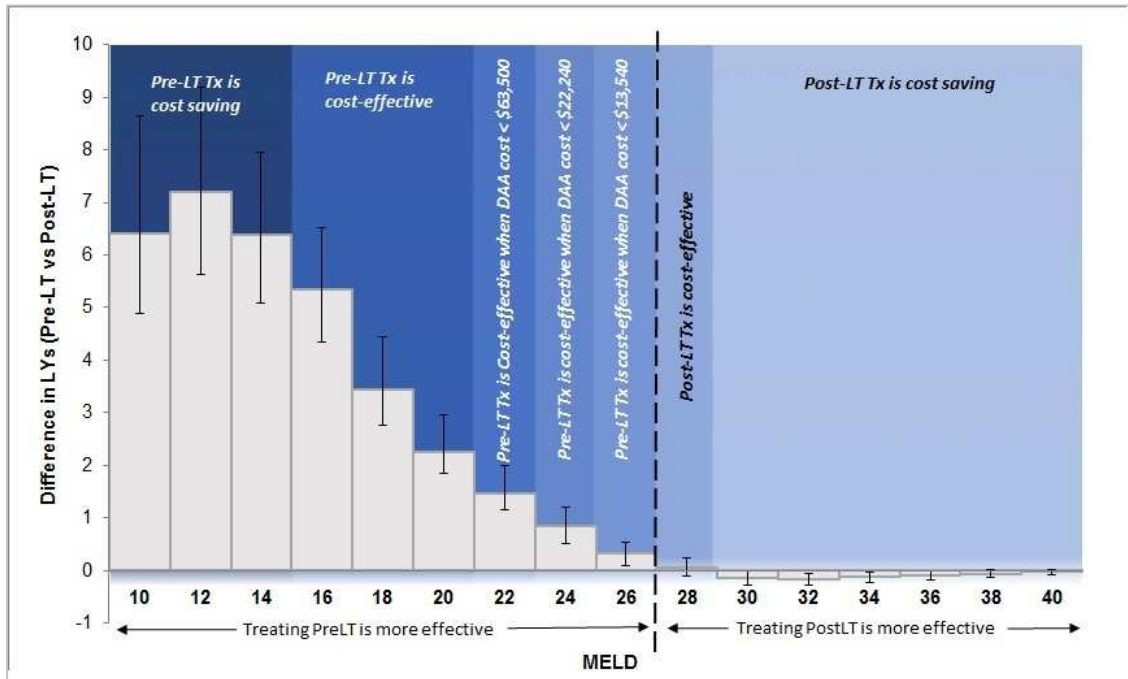

Figure S2. Clinical and cost-effectiveness of treatment timing for Region 1

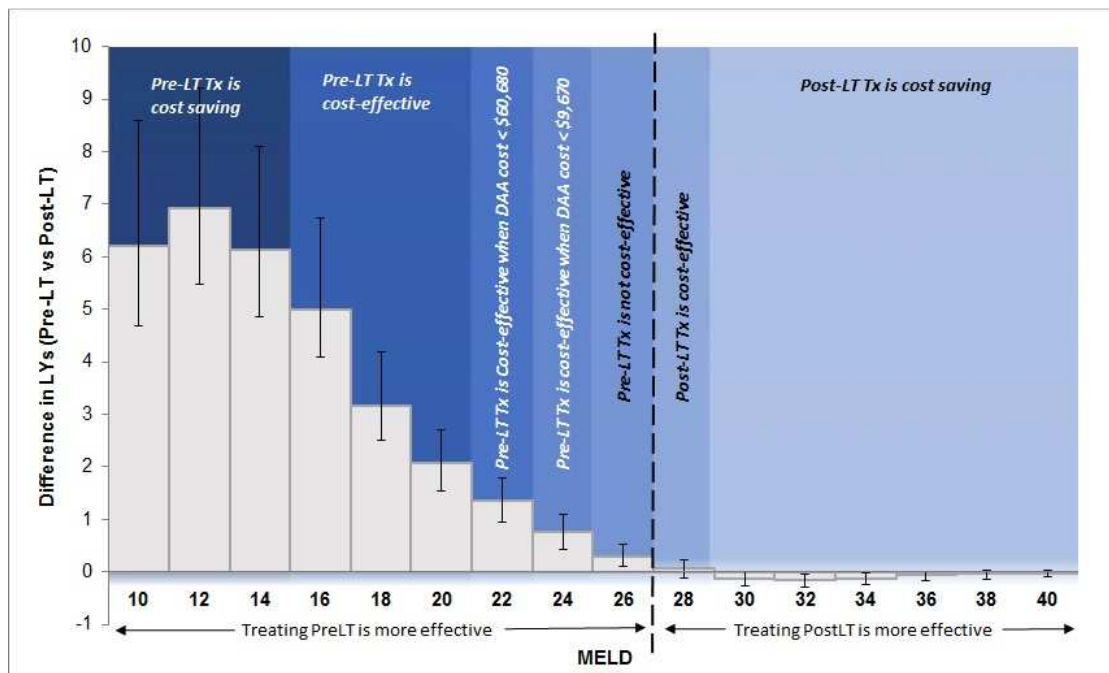

Figure S3. Clinical and cost-effectiveness of treatment timing for Region 2

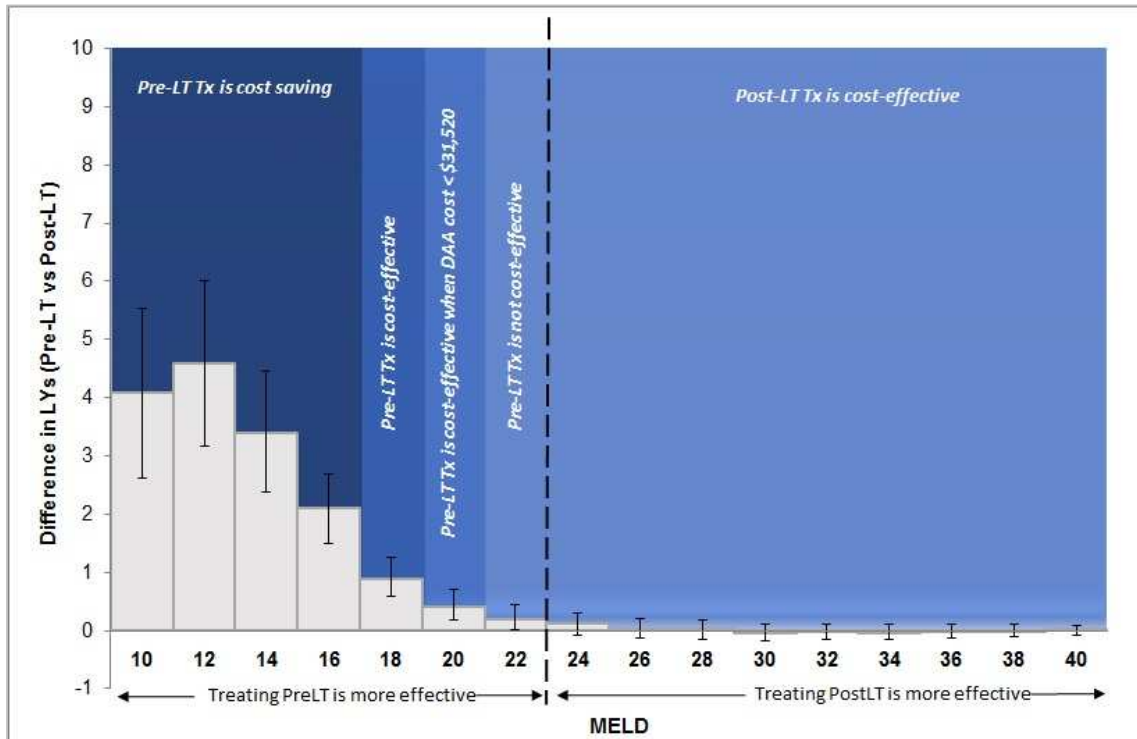

Figure S4. Clinical and cost-effectiveness of treatment timing for Region 3

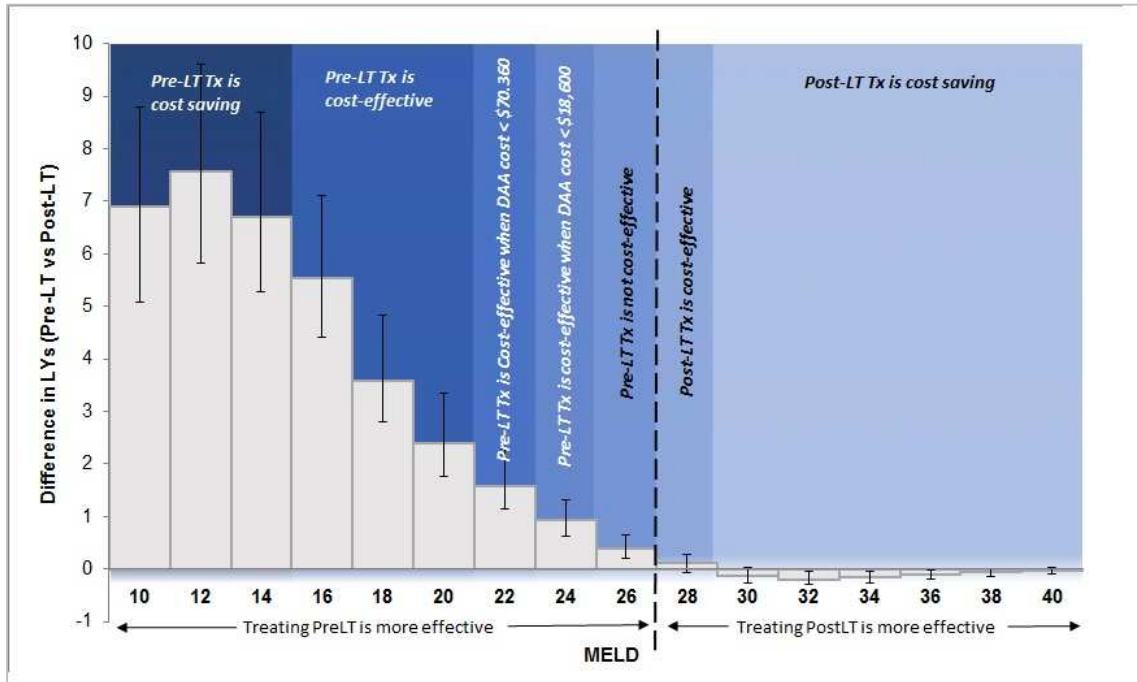

Figure S5. Clinical and cost-effectiveness of treatment timing for Region 4

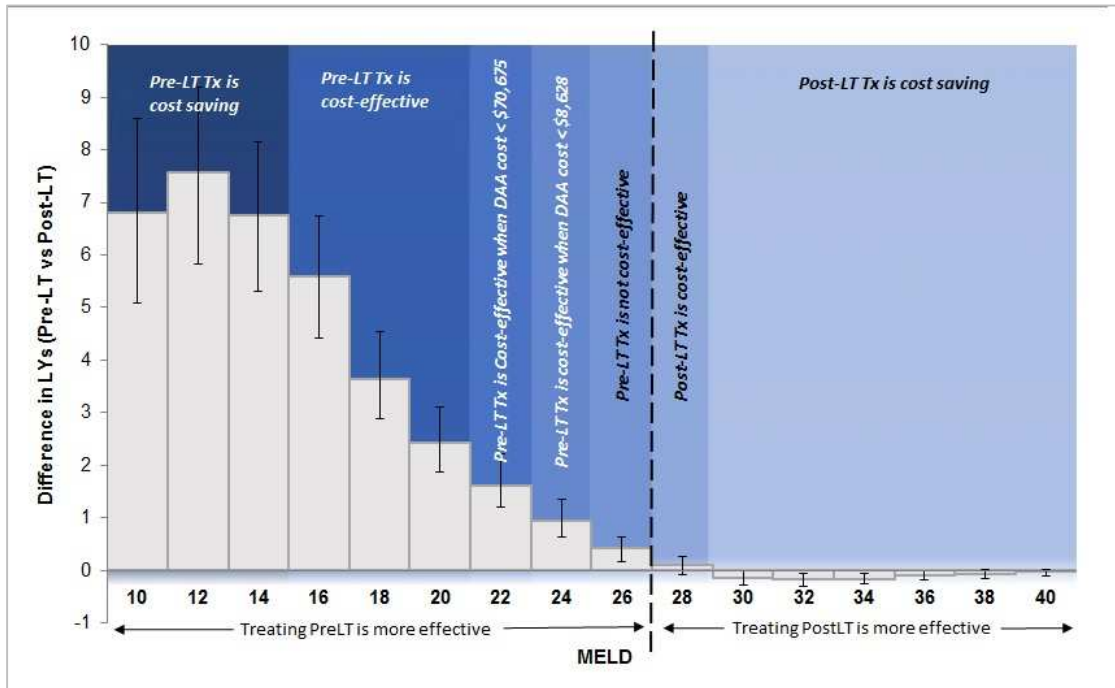

Figure S6. Clinical and cost-effectiveness of treatment timing for Region 5

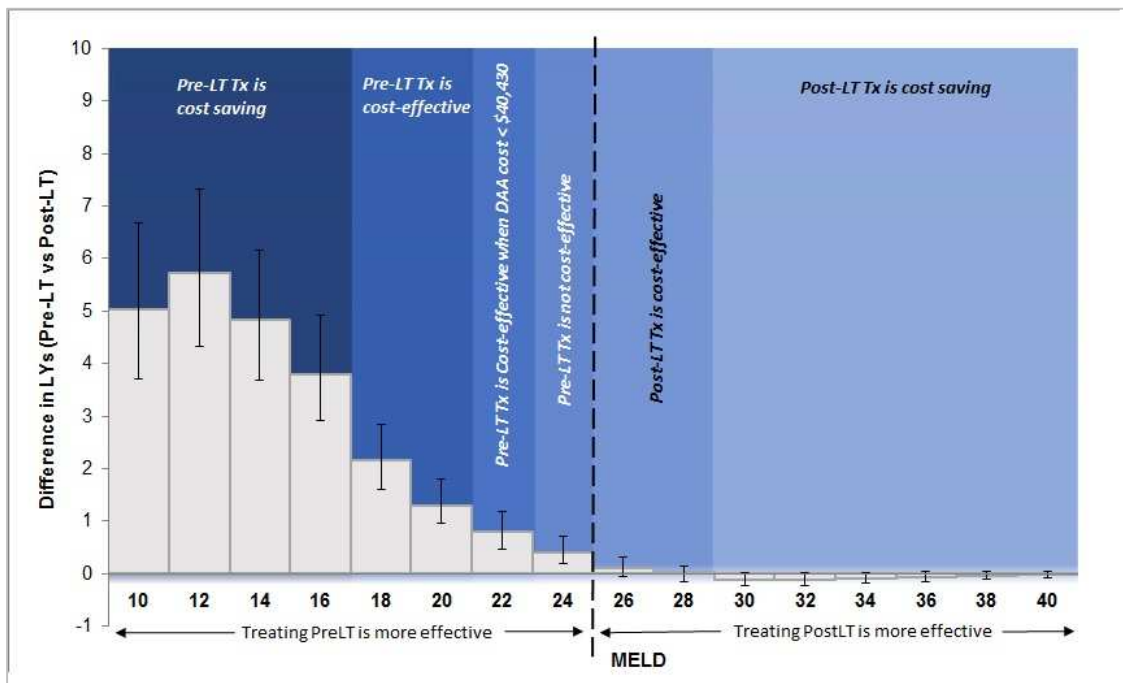

Figure S7. Clinical and cost-effectiveness of treatment timing for Region 6

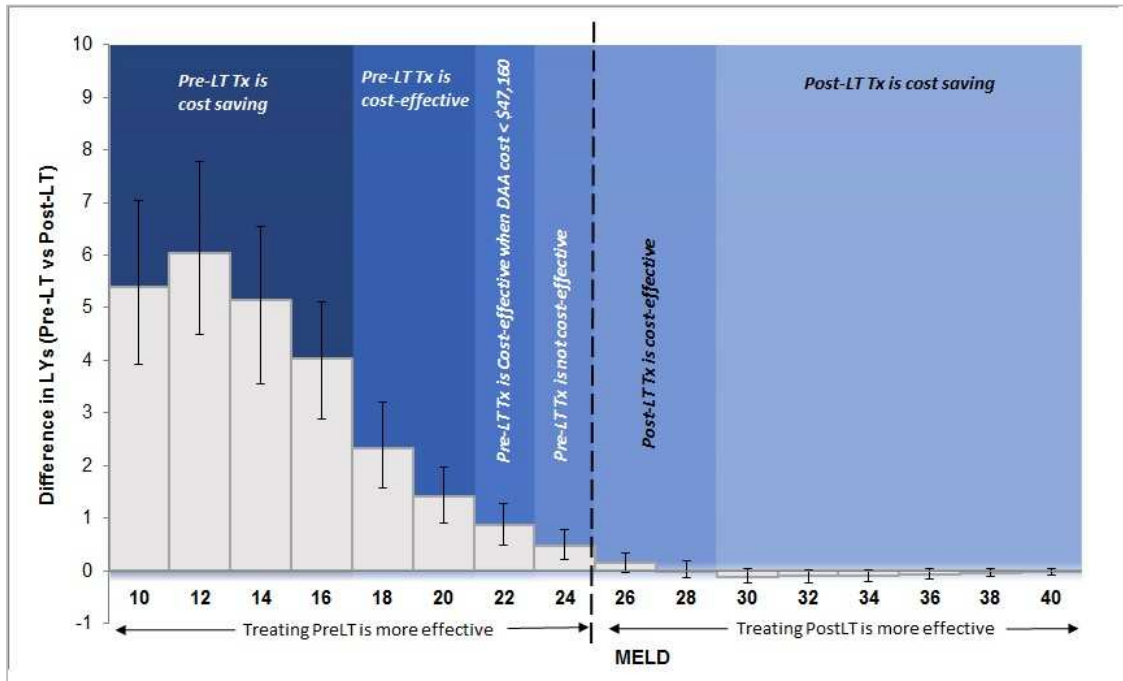

Figure S8. Clinical and cost-effectiveness of treatment timing for Region 7

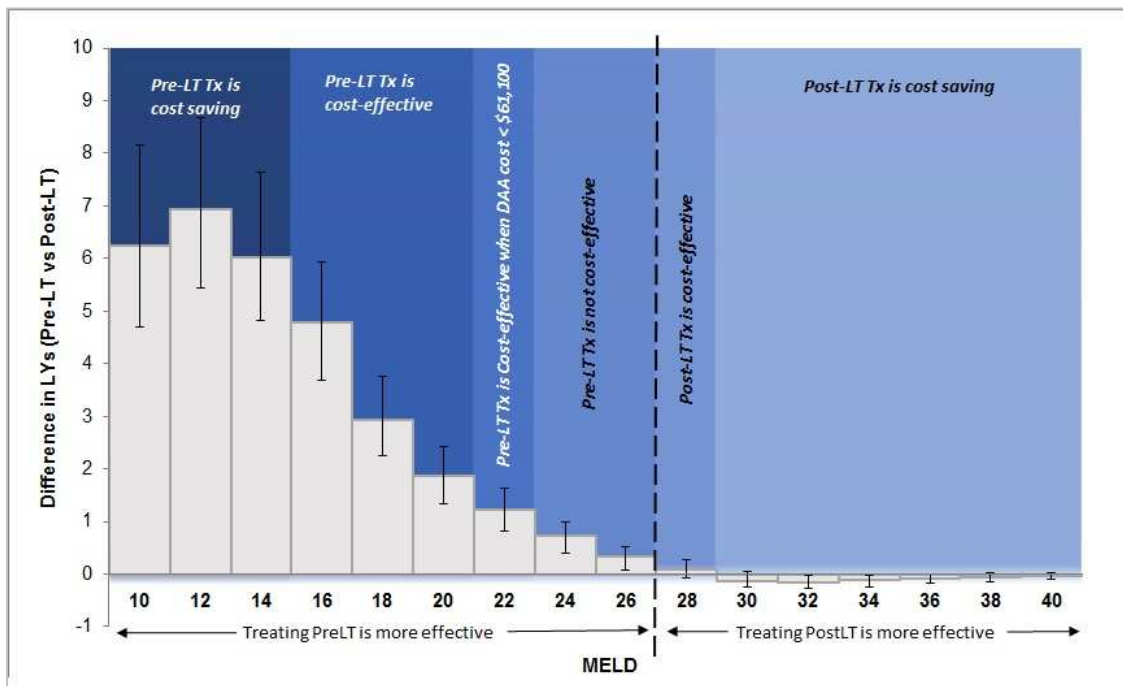

Figure S9. Clinical and cost-effectiveness of treatment timing for Region 8

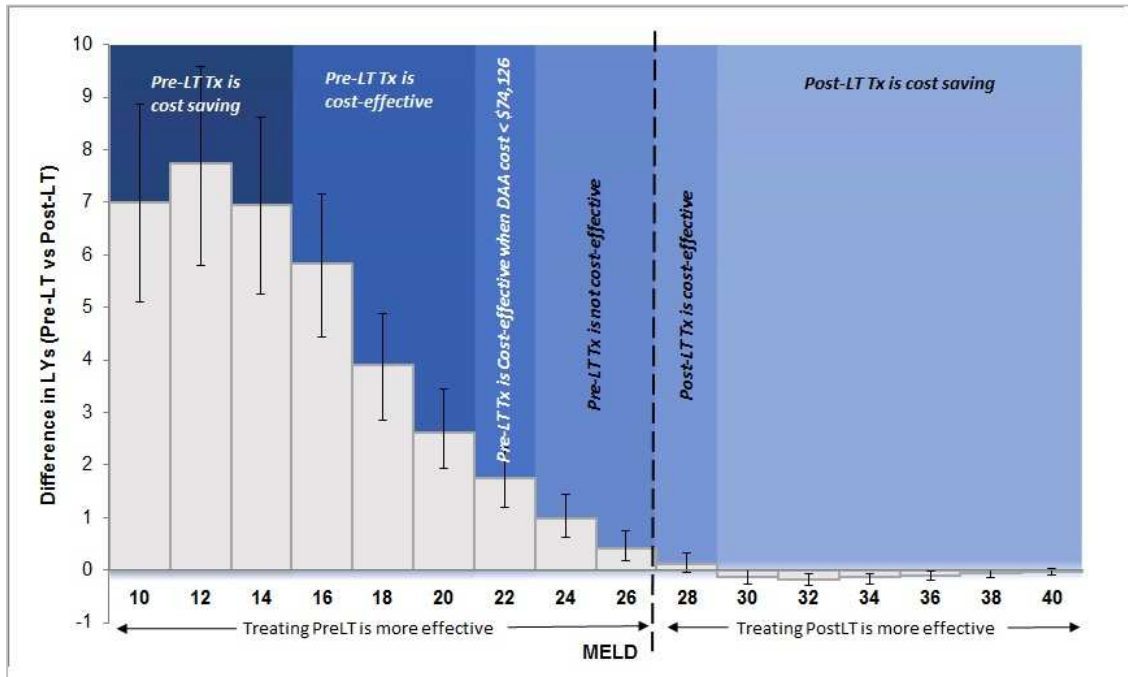

Figure S10. Clinical and cost-effectiveness of treatment timing for Region 9

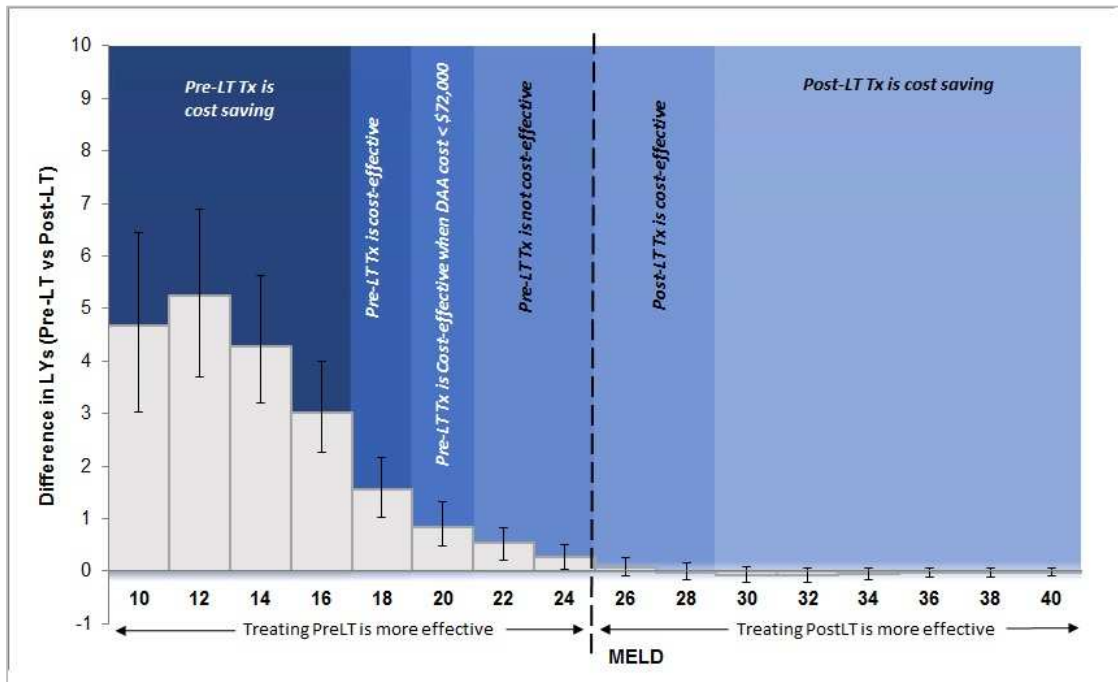

Figure S11. Clinical and cost-effectiveness of treatment timing for Region 10

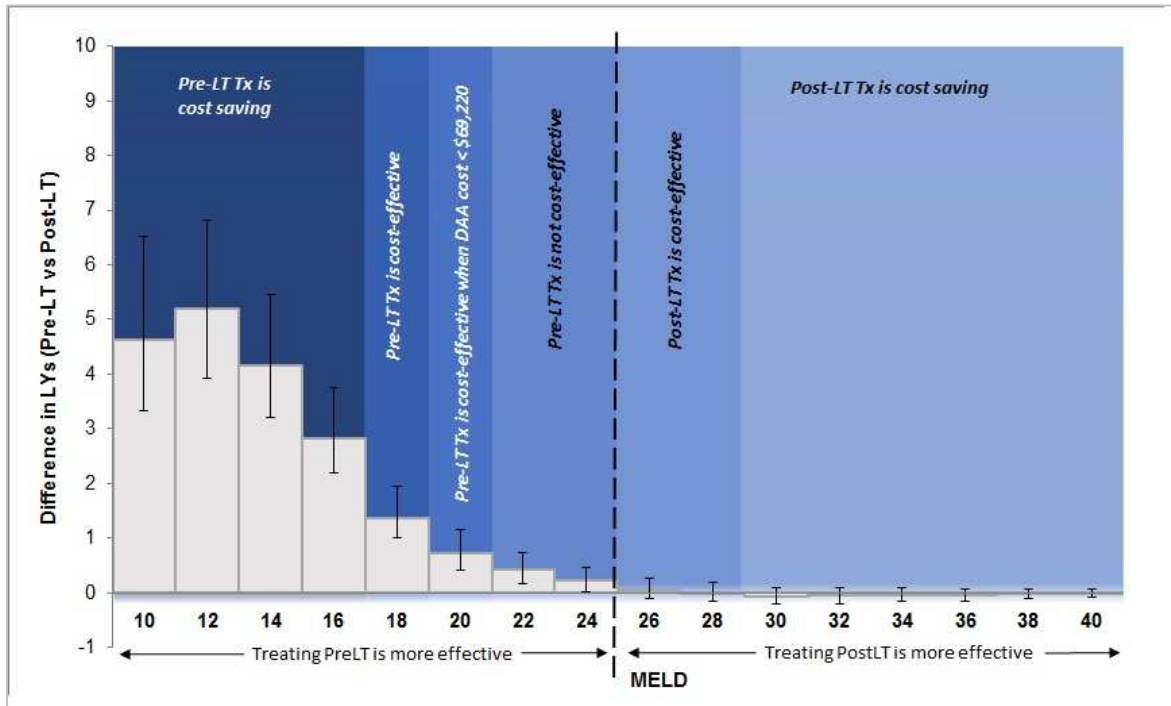

Figure S12. Clinical and cost-effectiveness of treatment timing for Region 11

Finally, we also compared net monetary benefit of treating HCV pre-LT versus post-LT for all UNOS regions. The net monetary benefit in pre-LT treatment was higher in regions with longer time on the LT waiting list, i.e. Region 4-5 and 9, and vice versa (**Figure S13**).

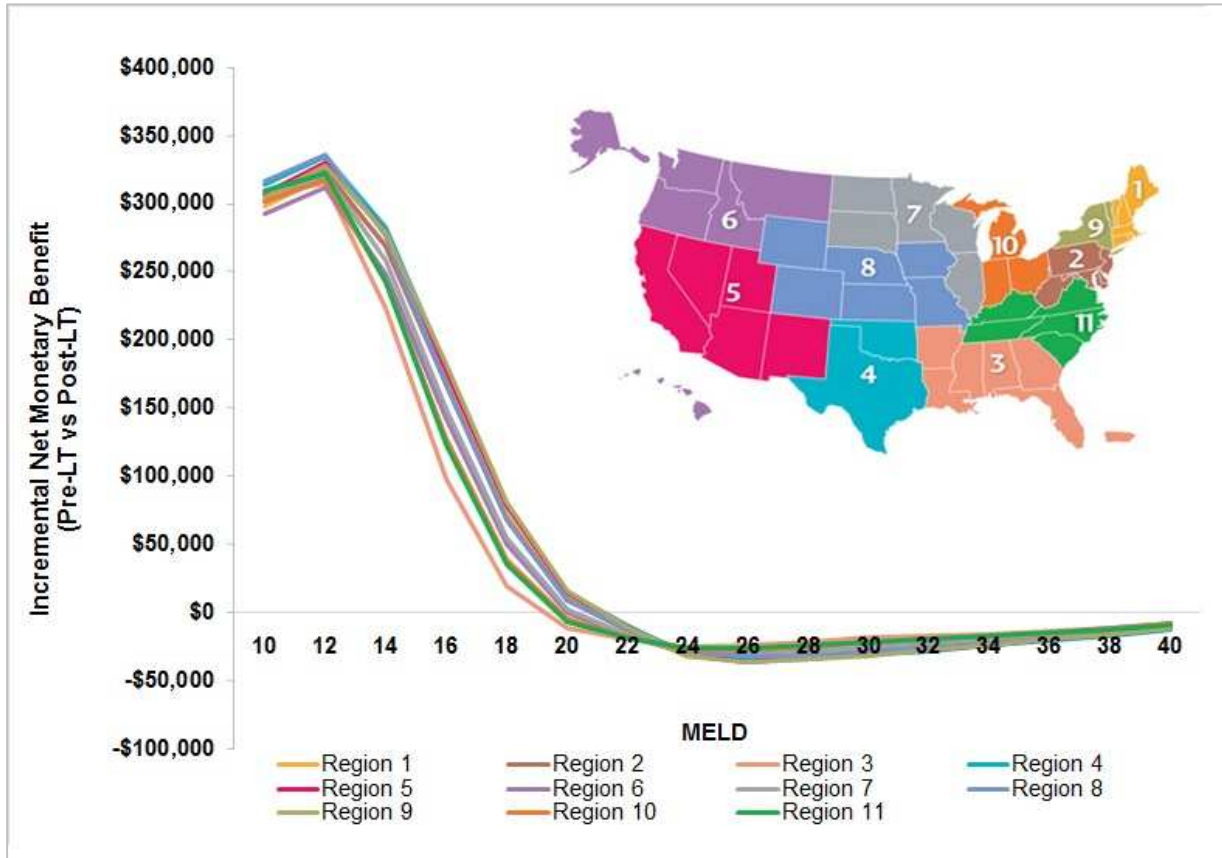

**Figure S13. Comparison of incremental net-monetary benefit of treating HCV pre-LT versus post-LT in different UNOS regions.** The net-monetary benefit of pre-LT treatment was higher in regions with longer time on the LT waiting list and vice versa.



## REFERENCES

1. Charlton M, Everson GT, Flamm SL, Kumar P, Landis C, Brown RS, Jr., et al. Ledipasvir and Sofosbuvir Plus Ribavirin for Treatment of HCV Infection in Patients With Advanced Liver Disease. *Gastroenterology*. 2015;149(3):649-59.
2. Manns M, Samuel D, Gane EJ, Mutimer D, McCaughan G, Buti M, et al. Ledipasvir and sofosbuvir plus ribavirin in patients with genotype 1 or 4 hepatitis C virus infection and advanced liver disease: a multicentre, open-label, randomised, phase 2 trial. *The Lancet Infectious Diseases*. 16(6):685-97.
3. Gane E, Manns M, McCaughan G, Curry MP, Peck-Radosavljevic M, Vlierberghe HV, et al., editors. Ledipasvir/sofosbuvir with ribavirin in patients with decompensated cirrhosis or liver transplantation and HCV infection: SOLAR-1 and -2 trials. *AASLD Abstract 1049*; 2015.
4. Alagoz O, Maillart LM, Schaefer AJ, Roberts MS. The optimal timing of living-donor liver transplantation. *Management Science*. 2004;50(10):1420-30.
5. Massie AB, Caffo B, Gentry SE, Hall EC, Axelrod DA, Lentine KL, et al. MELD Exceptions and Rates of Waiting List Outcomes. *Am J Transplant*. 2011;11(11):2362-71.
6. Thuluvath P, Guidinger M, Fung J, Johnson L, Rayhill S, Pelletier S. Liver transplantation in the United States, 1999–2008. *American Journal of Transplantation*. 2010;10(4p2):1003-19.
7. Berenguer M, Prieto M, San Juan F, Rayon JM, Martinez F, Carrasco D, et al. Contribution of donor age to the recent decrease in patient survival among HCV-infected liver transplant recipients. *Hepatology*. 2002;36(1):202-10.
8. Berenguer M, Prieto M, Rayon JM, Mora J, Pastor M, Ortiz V, et al. Natural history of clinically compensated hepatitis C virus-related graft cirrhosis after liver transplantation. *Hepatology*. 2000;32(4 Pt 1):852-8.
9. Drew. Adult Diagnosis of HCC versus HCV: UNOS Waiting Time (days) Stratified by Outcome of Interest.
10. Samuel D, Feray C. Recurrent hepatitis C after liver transplantation: clinical and therapeutical issues. *J Viral Hepat*. 2000;7(2):87-92.
11. Lai JC, O'Leary JG, Trotter JF, Verna EC, Brown RS, Jr., Stravitz RT, et al. Risk of advanced fibrosis with grafts from hepatitis C antibody-positive donors: a multicenter cohort study. *Liver Transpl*. 2012;18(5):532-8.
12. Chong CA, Gulamhussein A, Heathcote EJ, Lilly L, Sherman M, Naglie G, et al. Health-state utilities and quality of life in hepatitis C patients. *Am J Gastroenterol*. 2003;98(3):630-8.
13. Chhatwal J, Kanwal F, Roberts MS, Dunn MA. Cost-effectiveness and budget impact of hepatitis C virus treatment with sofosbuvir and ledipasvir in the United States. *Ann Intern Med*. 2015;162(6):397-406.
14. Thompson Coon J, Rogers G, Hewson P, Wright D, Anderson R, Jackson S, et al. Surveillance of cirrhosis for hepatocellular carcinoma: a cost-utility analysis. *Br J Cancer*. 2008;98(7):1166-75.
15. RedBook Online 2014 Available from: <http://www.redbook.com/redbook/online/>. Accessed November 10, 2015.
16. McAdam-Marx C, McGarry LJ, Hane CA, Biskupiak J, Deniz B, Brixner DI. All-cause and incremental per patient per year cost associated with chronic hepatitis C virus and associated

liver complications in the United States: a managed care perspective. *J Manag Care Pharm.* 2011;17(7):531-46.

17. Saab S, Hunt DR, Stone MA, McClune A, Tong MJ. Timing of hepatitis C antiviral therapy in patients with advanced liver disease: a decision analysis model. *Liver Transpl.* 2010;16(6):748-59.

18. Hanmer J, Lawrence WF, Anderson JP, Kaplan RM, Fryback DG. Report of nationally representative values for the noninstitutionalized US adult population for 7 health-related quality-of-life scores. *Medical Decision Making.* 2006;26(4):391-400.
